# Supplementary material
Source: Research Square preprint supplement (doi:10.21203/rs.3.rs-9663421/v1)
Supplement: Supplementary file 1 [file 8ad3ac9de00adc62bcc6c950.docx]

**Appendix A: Summary Statistics**

**Table A1. Descriptive Statistics, 2000Q1–2023Q4**

| **Variable** | **Mean** | **Std Dev** | **Min** | **Max** | **Obs** | **I(d)** |
| --- | --- | --- | --- | --- | --- | --- |
| Real GDP QoQ Growth (%) | 1.28 | 0.87 | -6.82 | 3.23 | 96 | I(0) |
| CPI Inflation YoY (%) | 5.84 | 3.91 | -0.59 | 17.78 | 96 | I(0) |
| BI Policy Rate (%) | 7.19 | 3.14 | 3.50 | 18.00 | 95 | I(0) |
| Govt. Expenditure (log, Tril. IDR) | 5.06 | 0.29 | 4.25 | 5.54 | 97 | I(1)→ΔI(0) |
| IDR/USD Exchange Rate (log) | 9.30 | 0.21 | 8.90 | 9.71 | 97 | I(1)→ΔI(0) |
| Foreign Reserves (log, Mil. USD) | 11.27 | 0.46 | 10.19 | 11.89 | 97 | I(1)→ΔI(0) |
| World Uncertainty Index (log) | 9.97 | 0.41 | 8.93 | 10.93 | 96 | I(0) |

Note: I(d) denotes integration order based on Augmented Dickey-Fuller and Phillips-Perron tests at 5% significance. I(1) variables are first-differenced prior to estimation. Δ denotes first difference.

**Appendix B: Nash Equilibrium Validation of SCCI**

To validate the SCCI against the game-theoretic literature, we construct a simplified Nash equilibrium benchmark following Salimi et al. (2025). Both authorities are modeled as minimizing quadratic loss functions:

*Lᵜᵃₜ = α₁(πₜ−π*)² + α₂(ŷₜ)² + α₃(rₜ−r*)²*

*Lᵜᵆₜ = β₁(ŷₜ)² + β₂(dₜ−d*)² + β₃(gₜ−g*)²*

where πₜ is inflation, ŷₜ is the output gap, rₜ is the policy rate, dₜ is the fiscal deficit ratio, and gₜ is government spending growth. The asterisks denote targets. Best response functions are estimated by OLS for each authority. The Nash equilibrium is the intersection of both best response functions in each quarter. We define coordination as the deviation of actual policy from the Nash equilibrium in the direction of the cooperative Pareto optimum. We find that SCCI = +1 periods correspond to actual policy that is closer to the cooperative Pareto solution in 87% of cases, and SCCI = −1 periods correspond to Nash equilibrium divergence in 79% of cases. This validation confirms that the SCCI is a valid proxy for the game-theoretic coordination concept.
